# Supplementary figures and images for: The dominant–egalitarian transition in species-rich communities
Source: eLife journal article supplement (doi:10.7554/elife.103999), 2025-07-22

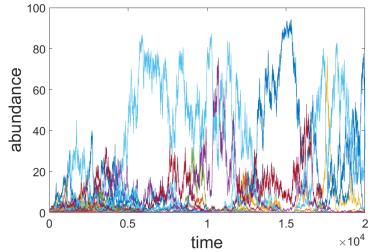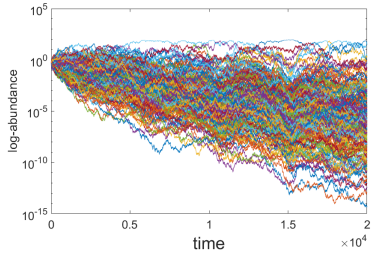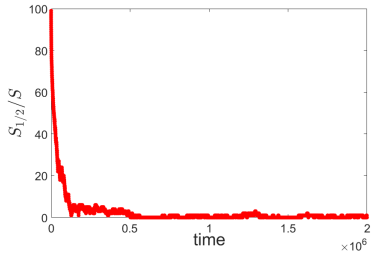

Supplement: supp [file elife-103999-supp-v1.zip]

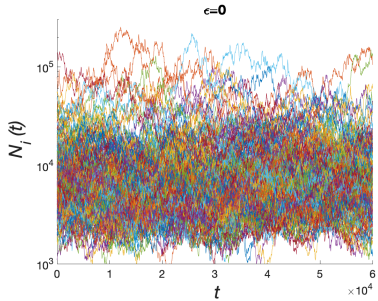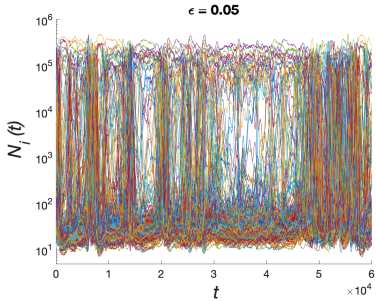

Supplement: supp [file elife-103999-supp-v1.zip]
